# Supplementary material for: Quantum chemical and matrix-IR characterization of CH3CN–BCl3: a complex with two distinct minima along the B–N bond potential
Source: Royal Society of Chemistry journal article supplement (doi:10.1039/c4cp01495b), 2014-01-01
Supplement: c4cp01495b1.pdf [file c4cp01495b1.pdf]

Table S1: Calculated frequencies for the “short-bond” form of CH<sub>3</sub>CN–BCl<sub>3</sub>.<sup>1</sup>

| <i>m</i> PW1 <sup>2</sup> |           | B3PW91 <sup>3</sup> |           | Symmetry <sup>4</sup> | Approximate Description                 |
|---------------------------|-----------|---------------------|-----------|-----------------------|-----------------------------------------|
| Wavenumber                | Intensity | Wavenumber          | Intensity |                       |                                         |
| 32                        | 0         | 31                  | 0         | A2                    | Torsion                                 |
| 70                        | 2.4       | 70                  | 2.4       | E                     | Intermolecular bend                     |
| 208                       | 0.0090    | 207                 | 0.0050    | E                     | BCl <sub>3</sub> asymmetric deformation |
| 248                       | 6.3       | 246                 | 6.2       | A1                    | B-N stretch                             |
| 303                       | 0.00010   | 301                 | 0.00030   | E                     | N-C-C bend                              |
| 413                       | 0.25      | 409                 | 0.32      | A1                    | BCl <sub>3</sub> symmetric stretch      |
| 478                       | 0.049     | 473                 | 0.089     | E                     | B-N-C bend                              |
| 667                       | 150       | 659                 | 150       | A1                    | BCl <sub>3</sub> symmetric deformation  |
| 782                       | 260       | 770                 | 260       | E                     | BCl <sub>3</sub> asymmetric stretch     |
| 1008                      | 12        | 1001                | 10        | A1                    | C-C stretch                             |
| 1051                      | 3.4       | 1046                | 3.2       | E                     | C-C-N bend                              |
| 1403                      | 2.7       | 1396                | 2.6       | A1                    | CH <sub>3</sub> symmetric deformation   |
| 1457                      | 14        | 1450                | 13.8      | E                     | CH <sub>3</sub> asymmetric deformation  |
| 2480 <sup>5</sup>         | 73        | 2457 <sup>5</sup>   | 64        | A1                    | C-N stretch                             |
| 3072                      | 4.4       | 3054                | 3.9       | A1                    | CH <sub>3</sub> symmetric stretch       |
| 3157                      | 3.8       | 3138                | 3.5       | E                     | CH <sub>3</sub> asymmetric stretch      |

1) Wavenumber values in units of cm<sup>-1</sup>, intensities in km/mol. 2) With the aug-cc-pVTZ basis set. R(B-N)=1.580 Å. 3) With the aug-cc-pVTZ basis set. R(B-N) = 1.581 Å. 4) Irreducible representation in the C<sub>3v</sub> point group. 5) For a more thorough description of these motions see ref. 21. 6) No scale factor applied. See text for discussion.

Table S2: Calculated frequencies for the “long-bond” form of CH<sub>3</sub>CN–BCl<sub>3</sub>.<sup>1</sup>

| <i>m</i> PW1 <sup>2</sup> |           | B3PW91 <sup>3</sup> |           | Symmetry <sup>4</sup> | Approximate Description                 |
|---------------------------|-----------|---------------------|-----------|-----------------------|-----------------------------------------|
| Wavenumber                | Intensity | Wavenumber          | Intensity |                       |                                         |
| 9i                        | 0         | 9i                  | 0         | A2                    | Torsion                                 |
| 17                        | 5.4       | 16                  | 5.4       | E                     | Intermolecular bend                     |
| 41                        | 0.87      | 32                  | 0.57      | A1                    | B-N stretch                             |
| 67                        | 2.6       | 57                  | 2.8       | E                     | B-N-C bend                              |
| 253                       | 0.62      | 252                 | 0.57      | E                     | BCl <sub>3</sub> asymmetric deformation |
| 392                       | 0.24      | 388                 | 0.21      | E                     | N-C-C bend                              |
| 427                       | 20        | 431                 | 16        | A1                    | BCl <sub>3</sub> symmetric deformation  |
| 473                       | 0.85      | 470                 | 0.59      | A1                    | BCl <sub>3</sub> symmetric stretch      |
| 948                       | 1.8       | 942                 | 1.4       | E                     | BCl <sub>3</sub> asymmetric stretch     |
| 957                       | 330       | 948                 | 330       | A1                    | C-C stretch                             |
| 1058                      | 2.5       | 1053                | 2.3       | E                     | C-C-N bend                              |
| 1407                      | 1.8       | 1400                | 1.8       | A1                    | CH <sub>3</sub> symmetric deformation   |
| 1471                      | 11        | 1464                | 11        | E                     | CH <sub>3</sub> asymmetric deformation  |
| 2397 <sup>5</sup>         | 18        | 2376 <sup>5</sup>   | 16        | A1                    | C-N stretch                             |
| 3073                      | 1.3       | 3056                | 1.7       | A1                    | CH <sub>3</sub> symmetric stretch       |
| 3153                      | 0.060     | 3134                | 0.13      | E                     | CH <sub>3</sub> asymmetric stretch      |

1) Wavenumber values in units of cm<sup>-1</sup>, intensities in km/mol. 2) With the aug-cc-pVTZ basis set. R(B-N)=3.099 Å. 3) With the aug-cc-pVTZ basis set. R(B-N) = 3.237 Å. 4) Irreducible representation in the C<sub>3v</sub> point group. 5) No scale factor applied. See text for discussion.
